# Supplementary material for: Mapping the Pareto Optimal Design Space for a Functionally Deimmunized Biotherapeutic Candidate
Source: PubMed Central journal article supplement (PMC4288714; doi:10.1371/journal.pcbi.1003988), 2015-01-08
Supplement: pcbi.1003988.s007.pdf [file pcbi.1003988.s007.pdf]

| <b>Table S3. Various Epitope Prediction Methods and Correlation with Experimental Binding<sup>a</sup></b> |                                     |                  |                  |                  |
|-----------------------------------------------------------------------------------------------------------|-------------------------------------|------------------|------------------|------------------|
| <b>Prediction Method and Predictive Binding Threshold</b>                                                 | <b>Fraction Correct<sup>b</sup></b> |                  |                  |                  |
|                                                                                                           | <b>DRB1*0101</b>                    | <b>DRB1*0401</b> | <b>DRB1*0701</b> | <b>DRB1*1501</b> |
| <b>Propred 5% Threshold</b>                                                                               | 0.62                                | 0.76             | 0.59             | 0.62             |
| <b>IEDB Concensus 5% Threshold</b>                                                                        | 0.52                                | 0.76             | 0.59             | 0.52             |
| <b>IEDB Concensus 10% Threshold</b>                                                                       | 0.55                                | 0.83             | 0.59             | 0.66             |
| <b>NNAlign 50 nM Threshold</b>                                                                            | 0.76                                | 0.62             | 0.66             | 0.48             |
| <b>NNAlign 1000 nM Threshold</b>                                                                          | 0.52                                | 0.76             | 0.69             | 0.90             |

a Predicted binding at the specified threshold was compared to experimental binding at a 100  $\mu$ M threshold

b Fraction correct predictions are taken from Figure 6, Table S4, and Table S5
