# Supplementary material for: Mapping the Pareto Optimal Design Space for a Functionally Deimmunized Biotherapeutic Candidate
Source: PubMed Central journal article supplement (PMC4288714; doi:10.1371/journal.pcbi.1003988), 2015-01-08
Supplement: pcbi.1003988.s008.pdf [file pcbi.1003988.s008.pdf]

| Table S4. IEDB Consensus Predictions and Correlation with Experimental Binding |                         |                        |                         |            |           |            |            |           |            |            |           |            |
|--------------------------------------------------------------------------------|-------------------------|------------------------|-------------------------|------------|-----------|------------|------------|-----------|------------|------------|-----------|------------|
| Peptide                                                                        | DRB1*0101               |                        |                         | DRB1*0401  |           |            | DRB1*0701  |           |            | DRB1*1501  |           |            |
|                                                                                | percentile <sup>a</sup> | correct5? <sup>b</sup> | correct10? <sup>c</sup> | percentile | correct5? | correct10? | percentile | correct5? | correct10? | percentile | correct5? | correct10? |
| A13+N14                                                                        | 13.08                   | 1                      | 1                       | 5.06       | 0         | 1          | 3.43       | 1         | 1          | 12.99      | 0         | 0          |
| A13D                                                                           | 50.05                   | 1                      | 1                       | 10.5       | 1         | 1          | 16.92      | 0         | 1          | 43.37      | 0         | 0          |
| A13E                                                                           | 45.58                   | 1                      | 1                       | 5.12       | 0         | 1          | 12.86      | 0         | 1          | 33.64      | 1         | 1          |
| N14R                                                                           | 15.98                   | 1                      | 1                       | 4.42       | 1         | 1          | 4.16       | 1         | 1          | 12.35      | 0         | 0          |
| V25                                                                            | 10.18                   | 0                      | 0                       | 1.86       | 1         | 1          | 3.59       | 1         | 1          | 14.56      | 0         | 0          |
| V25I                                                                           | 10.53                   | 0                      | 0                       | 3.11       | 1         | 1          | 5          | 0         | 1          | 9.11       | 0         | 1          |
| I48                                                                            | 25.85                   | 0                      | 0                       | 8.55       | 1         | 0          | 29.17      | 1         | 0          | 32.59      | 1         | 1          |
| I48V                                                                           | 20.67                   | 0                      | 0                       | 6.95       | 0         | 1          | 39.66      | 1         | 0          | 27.1       | 1         | 1          |
| G103+R105                                                                      | 23.77                   | 1                      | 1                       | 5.09       | 1         | 0          | 7.48       | 0         | 1          | 9.3        | 0         | 1          |
| R105S                                                                          | 26.51                   | 0                      | 0                       | 8.55       | 1         | 0          | 14.67      | 1         | 0          | 14.35      | 0         | 0          |
| G103D+R105S                                                                    | 34.74                   | 1                      | 1                       | 13.12      | 1         | 1          | 23.74      | 1         | 0          | 18.19      | 1         | 1          |
| L149                                                                           | 2.91                    | 1                      | 1                       | 6.72       | 0         | 1          | 3.75       | 1         | 1          | 9.84       | 0         | 1          |
| L149Q                                                                          | 21.6                    | 0                      | 0                       | 19.73      | 1         | 1          | 12.46      | 0         | 1          | 26.59      | 0         | 0          |
| R210+M215                                                                      | 21.75                   | 1                      | 1                       | 27.26      | 1         | 1          | 26.33      | 0         | 1          | 29.15      | 1         | 1          |
| R210H                                                                          | 22.89                   | 1                      | 1                       | 27.41      | 1         | 1          | 24.44      | 1         | 0          | 29.12      | 1         | 1          |
| M215Q                                                                          | 46.1                    | 1                      | 1                       | 49.99      | 1         | 1          | 25.57      | 1         | 0          | 48.62      | 1         | 1          |
| N232+M235+V243                                                                 | 27.97                   | 0                      | 0                       | 9.4        | 0         | 1          | 36.71      | 1         | 0          | 27.83      | 0         | 0          |
| M235Q                                                                          | 50.05                   | 1                      | 1                       | 16.25      | 1         | 1          | 38.25      | 1         | 0          | 44.32      | 1         | 1          |
| N232S+M235Q                                                                    | 43.54                   | 1                      | 1                       | 15.92      | 1         | 1          | 38.25      | 0         | 1          | 48.71      | 1         | 1          |
| M235Q+V243L                                                                    | 50.05                   | 1                      | 1                       | 16.13      | 1         | 1          | 38.25      | 1         | 0          | 45.55      | 1         | 1          |
| I262                                                                           | 20.67                   | 0                      | 0                       | 13.24      | 0         | 0          | 2.93       | 1         | 1          | 4.42       | 1         | 1          |
| I262V                                                                          | 24.27                   | 1                      | 1                       | 18.43      | 0         | 0          | 5.02       | 0         | 1          | 7.3        | 0         | 1          |
| N281                                                                           | 42.36                   | 0                      | 0                       | 35.63      | 1         | 1          | 60.4       | 0         | 1          | 39.85      | 1         | 1          |
| N281K                                                                          | 59.93                   | 1                      | 1                       | 47.75      | 1         | 1          | 62.51      | 1         | 0          | 49.86      | 1         | 1          |
| Q333+I334                                                                      | 23.11                   | 0                      | 0                       | 2.36       | 1         | 1          | 11.52      | 0         | 1          | 14.45      | 0         | 0          |
| Q333D                                                                          | 28.09                   | 0                      | 0                       | 4.36       | 1         | 1          | 17.95      | 0         | 1          | 17.92      | 0         | 0          |
| Q333D+I334L                                                                    | 25.47                   | 0                      | 0                       | 3.93       | 1         | 1          | 15.88      | 0         | 1          | 17.21      | 0         | 0          |
| T342                                                                           | 7.73                    | 0                      | 1                       | 0.42       | 1         | 1          | 27.19      | 1         | 0          | 4.09       | 1         | 1          |
| T342K                                                                          | 11.83                   | 0                      | 0                       | 2.44       | 1         | 1          | 34.26      | 1         | 0          | 2.16       | 1         | 1          |
| Total Correct                                                                  |                         | 15                     | 16                      |            | 22        | 24         |            | 17        | 17         |            | 15        | 19         |
| Fraction Correct                                                               |                         | 0.52                   | 0.55                    |            | 0.76      | 0.83       |            | 0.59      | 0.59       |            | 0.52      | 0.66       |

a Percentile score from IEDB consensus prediction method

b Correlation of binding prediction with experiment using a prediction threshold of ≤5% and experimental threshold of 100 μM. Correct=1; Incorrect=0

c Correlation of binding prediction with experiment using a prediction threshold of ≤10% and experimental threshold of 100 μM. Correct=1; Incorrect=0
