# Supplementary material for: Mapping the Pareto Optimal Design Space for a Functionally Deimmunized Biotherapeutic Candidate
Source: PubMed Central journal article supplement (PMC4288714; doi:10.1371/journal.pcbi.1003988), 2015-01-08
Supplement: pcbi.1003988.s009.pdf [file pcbi.1003988.s009.pdf]

Table S5. NAlign Predictions and Correlation with Experimental Binding

| Peptide                 | DRB1*0101         |                         |                           | DRB1*0401 |            |              | DRB1*0701 |            |              | DRB1*1501 |            |              |
|-------------------------|-------------------|-------------------------|---------------------------|-----------|------------|--------------|-----------|------------|--------------|-----------|------------|--------------|
|                         | IC50 <sup>a</sup> | correct50? <sup>b</sup> | correct1000? <sup>c</sup> | IC50      | correct50? | correct1000? | IC50      | correct50? | correct1000? | IC50      | correct50? | correct1000? |
| A13+N14                 | 23.9              | 0                       | 0                         | 195.8     | 0          | 1            | 18.1      | 1          | 1            | 579.3     | 0          | 1            |
| A13D                    | 511.1             | 1                       | 0                         | 614.4     | 1          | 0            | 132.6     | 0          | 1            | 4956.3    | 0          | 0            |
| A13E                    | 326.5             | 1                       | 0                         | 724.7     | 0          | 1            | 86.4      | 0          | 1            | 2640      | 1          | 1            |
| N14R                    | 31.5              | 0                       | 0                         | 94.9      | 0          | 1            | 21.5      | 1          | 1            | 420.1     | 0          | 1            |
| V25                     | 8.1               | 1                       | 1                         | 29.6      | 1          | 1            | 18.9      | 1          | 1            | 583.2     | 0          | 1            |
| V25I                    | 9.1               | 1                       | 1                         | 42.7      | 1          | 1            | 25.9      | 1          | 1            | 448.1     | 0          | 1            |
| I48                     | 15.3              | 1                       | 1                         | 105.6     | 1          | 0            | 373.5     | 1          | 0            | 1577.4    | 1          | 1            |
| I48V                    | 19.5              | 1                       | 1                         | 85.6      | 0          | 1            | 754.6     | 1          | 0            | 1661.3    | 1          | 1            |
| G103+R105               | 27.1              | 0                       | 0                         | 63.9      | 1          | 0            | 41.8      | 1          | 1            | 182.9     | 0          | 1            |
| R105S                   | 30                | 1                       | 1                         | 139       | 1          | 0            | 105.4     | 1          | 0            | 567.7     | 0          | 1            |
| G103D+R105S             | 108.2             | 1                       | 0                         | 171.2     | 1          | 0            | 244.6     | 1          | 0            | 773.4     | 1          | 0            |
| L149                    | 7.3               | 1                       | 1                         | 91.1      | 0          | 1            | 59.3      | 0          | 1            | 110.2     | 0          | 1            |
| L149Q                   | 51.5              | 0                       | 1                         | 434.5     | 1          | 0            | 358.6     | 0          | 1            | 392       | 0          | 1            |
| R210+M215               | 52.1              | 1                       | 0                         | 2422.4    | 1          | 1            | 302       | 0          | 1            | 1379.7    | 1          | 1            |
| R210H                   | 57.2              | 1                       | 0                         | 3055.3    | 1          | 1            | 259.3     | 1          | 0            | 1986.4    | 1          | 1            |
| M215Q                   | 267.7             | 1                       | 0                         | 7802      | 1          | 1            | 1052.9    | 1          | 1            | 3900      | 1          | 1            |
| N232+M235+V243          | 126.3             | 0                       | 1                         | 1159      | 0          | 0            | 1520.1    | 1          | 1            | 1911.8    | 0          | 0            |
| M235Q                   | 598               | 1                       | 0                         | 1735.7    | 1          | 1            | 1407.9    | 1          | 1            | 6260.3    | 1          | 1            |
| N232S+M235Q             | 478.2             | 1                       | 0                         | 1470.8    | 1          | 1            | 1821.5    | 0          | 0            | 7702.3    | 1          | 1            |
| M235Q+V243L             | 453.2             | 1                       | 0                         | 1580.6    | 1          | 1            | 1257.8    | 1          | 1            | 5809.3    | 1          | 1            |
| I262                    | 26.9              | 1                       | 1                         | 383.1     | 0          | 1            | 15.6      | 1          | 1            | 25.2      | 1          | 1            |
| I262V                   | 37.9              | 0                       | 0                         | 498.9     | 0          | 1            | 26        | 1          | 1            | 30.6      | 1          | 1            |
| N281                    | 151               | 0                       | 1                         | 3622.5    | 1          | 1            | 2459.3    | 0          | 0            | 3743.5    | 1          | 1            |
| N281K                   | 238.6             | 1                       | 0                         | 6695.8    | 1          | 1            | 2751.3    | 1          | 1            | 2338.1    | 1          | 1            |
| Q333+I334               | 24.9              | 1                       | 1                         | 101.3     | 0          | 1            | 73.4      | 0          | 1            | 417.1     | 0          | 1            |
| Q333D                   | 37.5              | 1                       | 1                         | 117.3     | 0          | 1            | 146.7     | 0          | 1            | 696.6     | 0          | 1            |
| Q333D+I334L             | 19.9              | 1                       | 1                         | 105.2     | 0          | 1            | 119.5     | 0          | 1            | 643.9     | 0          | 1            |
| T342                    | 13.6              | 1                       | 1                         | 12.2      | 1          | 1            | 322.8     | 1          | 0            | 82        | 0          | 1            |
| T342K                   | 21.1              | 1                       | 1                         | 35.5      | 1          | 1            | 534.1     | 1          | 0            | 59.1      | 0          | 1            |
| <b>Total Correct</b>    |                   | 22                      | 15                        |           | 18         | 22           |           | 19         | 20           |           | 14         | 26           |
| <b>Fraction Correct</b> |                   | 0.76                    | 0.52                      |           | 0.62       | 0.76         |           | 0.66       | 0.69         |           | 0.48       | 0.90         |

a IC<sub>50</sub> value from NAlign prediction method

b Correlation of binding prediction with experiment using a prediction threshold of IC<sub>50</sub>≤50 nM and experimental threshold of 100 μM. Correct=1; Incorrect=0

c Correlation of binding prediction with experiment using a prediction threshold of IC<sub>50</sub>≤1000 nM and experimental threshold of 100 μM. Correct=1; Incorrect=0
